# Supplementary material for: Highly Selective Adsorption of 99TcO4−/ReO4− by a Novel Polyamide-Functionalized Polyacrylamide Polymer Material
Source: MDPI journal article supplement (doi:10.3390/toxics10100630), 2022-10-21
Supplement: s1 [file s1]

## Supplementary Materials

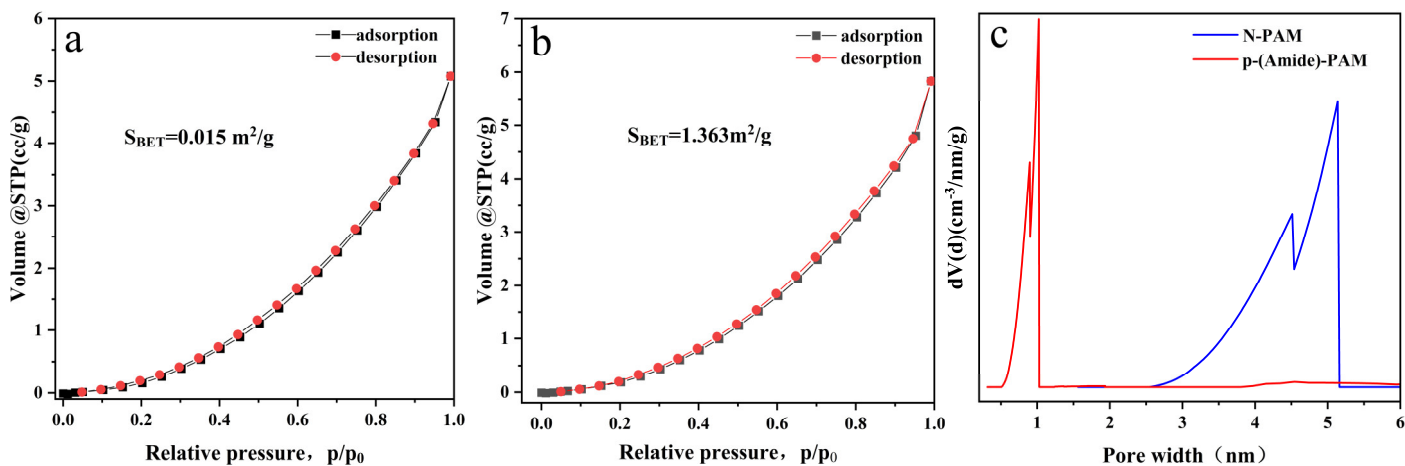

**Figure S1.**  $N_2$  adsorption-desorption isotherms of the N-PAM (a) and p-(Amide)-PAM (b), pore size distribution of N-PAM and p-(Amide)-PAM (c).

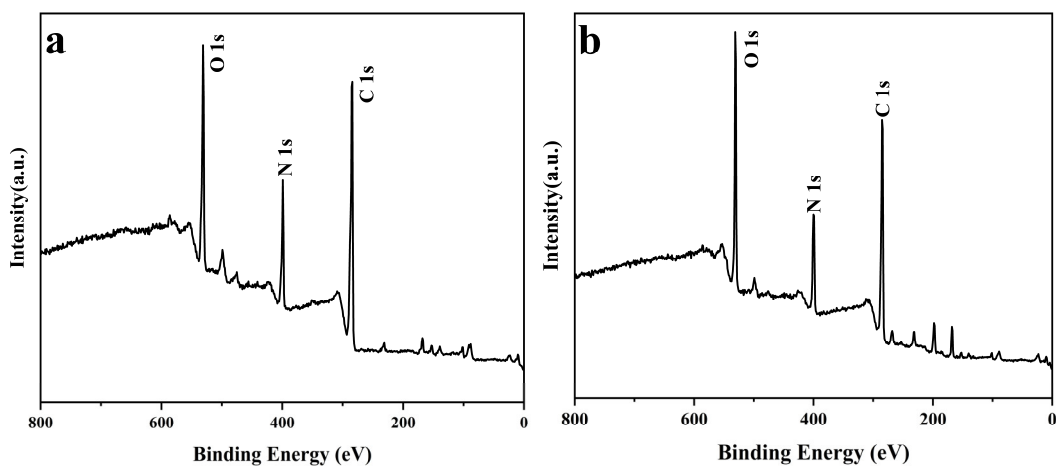

**Figure S2.** XPS wide scan spectrum of N-PAM (a) and p-(Amide)-PAM (b).
